# Supplementary material for: A novel precipitating auxiliary approach to the purification of Baylis–Hillman adducts
Source: Royal Society of Chemistry journal article supplement (doi:10.1039/b103969p), 2001-01-01
Supplement: b103969p.doc [file b103969p.doc]

# Supporting Information

## Todd Bosanac and Craig S. Wilcox

Chemical Communications

# EXPERIMENTAL

**General Procedures**. Proton (1H NMR) and carbon (13C NMR) nuclear magnetic resonance spectra were recorded on Bruker Avance 300 and Bruker DRX 500 spectrometers at 300 MHz and 75 MHz, and 500 MHz and 125 MHz, respectively. Chemical shifts (1H-NMR and 13C-NMR) are expressed in parts per million ( units) downfield from tetramethylsilane (TMS). The solvent peak was used as the reference value. For 1H NMR: CDCl3 = 7.27 ; DMSO-*d6* = 2.49 ; acetone- *d6* = 2.05 . For 13C NMR: CDCl3 = 77.23 ; DMSO- *d6* = 39.51 ; acetone-*d6*. For the proton data: s = singlet; d = doublet; t = triplet; q = quartet; dd = doublet of doublets; dq = doublet of quartets; m = multiplet; br = broad; app = apparent. Low and high resolution mass spectra were recorded on a VG 7070 spectrometer. Infrared (IR) spectra were collected on a Mattson Cygnus 100 or an IBM IR/32 spectrometer. Melting points were determined using a Thomas Hoover capillary melting point apparatus and are uncorrected. UV-Vis spectra were recorded on a Hewlett-Packard 8451A Diode Array Spectrophotometer. Thin layer chromatography (TLC) was performed using E. Merck silica gel 60F-254 (0.25 mm) analytical glass plates. Silica gel columns for flash chromatography, according to the method of Still,1 were prepared with E. Merck silica gel 60 (230-240 mesh ASTM).

Dry solvents were distilled shortly before use from an appropriate drying agent under nitrogen atmosphere. Tetrahydrofuran (THF) and diethyl ether (Et2O) were distilled from sodium and benzophenone. Dichloromethane (CH2Cl2), triethylamine (TEA), and pyridine were distilled from calcium hydride. Ethyl acetate was dried over 4 Å molecular sieves for at least 24 hours prior to use. Hexane refers to the mixed hydrocarbon fraction (bp 68-70 C), principally *n*-hexane, and was purified as follows: the commercial solvent was stirred over concentrated H2SO4 for at least 24 hours, decanted, stirred over anhydrous NaHCO3 for at least 6 hours, decanted, and distilled. Other commercially available reagents and solvents were reagent grade and were used without further purification unless otherwise noted.

Reactions run under nitrogen atmosphere were arranged with a mercury or oil bubbler so that the system could be alternately evacuated and filled with nitrogen and left under positive pressure. Syringes were dried in an oven at 120 C and cooled in a desiccator over calcium sulphate prior to use. Reactions at “room temperature” were conducted under ambient laboratory conditions: T = 20-27 C, p = 720-770 mmHg. References to “removal of solvents under reduced pressure“ refer to rotary evaporation of the sample at 25-65 C under reduced pressure (18-25 mm Hg), sometimes followed by removal of residual volatile materials under vacuum (0.05-0.5 mmHg) at room temperature. Yields are reported based on the amount of isolated material obtained after the indicated procedure. The purities of these products were each determined by 1H-NMR and are greater than 95% unless otherwise noted.

# EXPERIMENTAL PROCEDURES

**(*E*)-2-(Hydroxy-phenyl-methyl)-acrylic acid 4-(2-biphenyl-4-yl-vinyl)-benzyl ester (3*E*).** A solution of acrylate **2*Z*** (825 mg, 2.43 mmol), DABCO (13.6mg, 0.12 mmol), and benzaldehyde (distilled under vacuum from CaH2, 420 L, 4.13 mmol) in CH2Cl2 (300 L) was stirred at 23 C for 20 days. The solution was then diluted with EtOAc (40 mL) and treated with 1 M HCl (20 mL). The organic phase was washed with brine (20 mL), dried over MgSO4, and filtered. The volatile components of the filtrate were removed under reduced pressure to afford a crude residue that was immediately dissolved in Et2O (7 mL). Iodine (123 mg, 0.49 mmol) and benzoyl peroxide (13 mg, 0.05 mmol) were added and the solution was irradiated with a 250 W sunlamp for 4 h after which time the reaction progress was checked by removing a small (~100 L) aliquot of the reaction mixture for analysis by 1H-NMR spectroscopy. Samples were returned to the reaction mixture. The reaction mixture was finally concentrated, diluted with CHCl3, and washed with saturated Na2SO3 until the organic layer was clear. The organic phase was dried over MgSO4 and filtered. The volatile components of the filtrate were removed under reduced pressure to afford a crude solid which was washed with hexanes (3 x 15 mL) and MeOH (3 x 5 mL) to afford **3*E*** as a white solid (758 mg, 70%): R*f* 0.22 (3:1 Hex:EtOAc); mp 164-167 C; IR (KBr) 3531, 3028, 1704, 1627, 1486, 1281, 1170, 971, 762 cm-1; 1H NMR (300 MHz, CDCl3)  7.65-7.62 (m, 6 H),  7.52-7.44 (m, 4 H), 7.40-7.25 (m, 8 H), 7.16 (s, 2 H), 6.43 (s, 1 H), 5.89 (s, 1 H), 5.61 (d, *J* = 5.5 Hz, 1 H), 5.17 (s, 2 H), 2.92 (d, *J* = 5.5 Hz, 1 H); 13C NMR (75 MHz, acetone-*d6*)  165.3, 143.8, 142.9, 139.6, 139.2, 136.8, 136.2, 135.3, 129.0, 128.2, 128.1, 127.5, 127.3, 127.1, 127.0, 126.9, 126.5, 124.1, 70.8, 65.5; HRMS m/e calcd for C31H26O3 446.1882, found 446.1889.

**(*E*)-2-(1-Hydroxy-3-phenyl-propyl)-acrylic acid 4-(2-biphenyl-4-yl-vinyl)-benzyl ester (4*E*).** A solution of acrylate **2*Z*** (190 mg, 0.56 mmol), DABCO (4 mg, 0.03 mmol), and hydrocinnamaldehyde (distilled under vacuum from CaH2, 125 L, 0.95 mmol) in CH2Cl2 (50 L) was stirred at 23 C for 5 days. The solution was then diluted with CHCl3 (20 mL) and treated with water (20 mL). The organic phase was washed with brine (20 mL), dried over MgSO4, and filtered. The volatile components of the filtrate were removed under reduced pressure to afford a crude residue that was immediately dissolved in CCl4 (2 mL). Iodine (28 mg, 0.11 mmol) and benzoyl peroxide (7 mg, 0.03 mmol) were added and the solution was irradiated with a 250 W sunlamp for 20 h during which time reaction progress was monitored by 1H NMR according to the method detailed in the description of the preparation of ester **3*E***. The reaction mixture was concentrated, diluted with CHCl3, and washed with saturated Na2SO3 until the organic layer was clear. The organic phase was dried over MgSO4 and filtered. The volatile components of the filtrate were removed under reduced pressure to afford a crude solid which was washed with hexanes (3 x 10 mL) and 1:1 Hex:Et2O (3 x 4 mL) to afford **4*E*** as a white solid (153 mg, 58%): R*f* 0.11 (4:1 Hex:EtOAc); mp 173-176 C; IR (neat) 3430, 1708, 1642, 1497, 1482, 1450, 1402, 1214, 966, 908, 828 cm-1; 1H NMR (300 MHz, CDCl3)  7.65-7.62 (m, 6 H), 7.55 (d, *J* = 8.0 Hz, 2 H), 7.47 (t, *J* = 7.3 Hz, 2 H), 7.39-7.35 (m, 3 H), 7.32-7.19 (m, 5 H), 7.17 (s, 2 H), 6.32 (s, 1 H), 5.86 (s, 1 H), 5.23 (s, 2 H), 4.73 (s, 1 H), 4.47 (app t, *J* = 6.2 Hz, 1 H), 2.86-2.66 (m, 2 H), 2.60 (br s, 1 H), 2.04-1.96 (m, 2 H); 13C NMR (75 MHz, CDCl3)  166.5, 142.5, 141.9, 140.8, 140.7, 137.7, 136.4, 135.0, 129.0, 128.9, 128.7, 128.6, 128.5, 127.6, 127.2, 127.1, 126.9, 126.1, 125.8, 71.3, 66.6, 37.8, 32.3; HRMS m/e calcd for C33H30O3 474.2195, found 474.2195.

**(*E*)-2-[(3-Chloro-phenyl)-hydroxy-methyl]-acrylic acid 4-(2-biphenyl-4-yl-vinyl)-benzyl ester (5*E*).** A solution of acrylate **2*Z*** (190 mg, 0.56 mmol), DABCO (4 mg, 0.03 mmol), and 3-chlorobenzaldehyde (distilled under vacuum from CaH2, 110 L, 0.95 mmol) in CH2Cl2 (50 L) was stirred at 23 C for 5 days. The solution was then diluted with CHCl3 (20 mL) and treated with water (20 mL). The organic phase was washed with brine (20 mL), dried over MgSO4, and filtered. The volatile components of the filtrate were removed under reduced pressure to afford a crude residue that was immediately dissolved in CCl4 (2 mL). Iodine (28 mg, 0.11 mmol) and benzoyl peroxide (7 mg, 0.03 mmol) were added and the solution was irradiated with a 250 W sunlamp for 8 h during which time reaction progress was monitored by1H NMR according to the method detailed in the description of the preparation of ester **3*E***. The reaction mixture was concentrated, diluted with CHCl3, and washed with saturated Na2SO3 until the organic layer was clear. The organic phase was dried over MgSO4 and filtered. The volatile components of the filtrate were removed under reduced pressure to afford a crude solid which was washed with hexanes (3 x 10 mL) and Et2O (3 x 5 mL) to afford **5*E*** as a white solid (209 mg, 78%): R*f* 0.10 (4:1 Hex:EtOAc); mp 164-167 C; IR (neat) 3457, 1711, 1628, 1596, 1572, 1141, 1042, 974, 836, 764, 697 cm-1; 1H NMR (300 MHz, CDCl3)  7.65-7.62 (m, 7 H), 7.54-7.44 (m, 5 H), 7.39-7.34 (m, 2 H), 7.29-7.27 (m, 3 H), 7.16 (s, 2 H), 6.45 (s, 1 H), 5.90 (s, 1 H), 5.56 (d, *J* = 6.0 Hz, 1 H), 5.18 (s, 2 H), 3.01 (d *J* = 6.0 Hz, 1 ); 13C NMR (75 MHz, CDCl3)  166.1, 143.5, 141.5, 140.8, 140.7, 137.7, 136.3, 134.7, 134.6, 129.9, 129.0, 128.9, 128.2, 127.6, 127.3, 127.2, 127.1, 127.0, 126.9, 125.0, 73.6, 66.8; HRMS m/e calcd for C31H25O3Cl 480.1492, found 480.1504.

**(*E*)-2-[Hydroxy-(4-nitro-phenyl)-methyl]-acrylic acid 4-(2-biphenyl-4-yl-vinyl)-benzyl ester (6*E*).** A solution of acrylate **2*Z*** (300 mg, 0.88 mmol), DABCO (5 mg, 0.04 mmol), and 4-nitrobenzaldehyde (recrystallized from 3:1 H2O:EtOH, 227 mg, 1.50 mmol) in CH2Cl2 (880 L) was stirred at 23 C for 3 days. The volatile components of the reaction mixture were removed under reduced pressure to afford a crude residue that was immediately dissolved in CCl4 (3 mL). Iodine (45 mg, 0.18 mmol) and benzoyl peroxide (10 mg, 0.04 mmol) were added and the solution was irradiated with a 250 W sunlamp for 23 h during which time reaction progress was monitored by 1H NMR according to the method detailed in the description of the preparation of ester **3*E***. The reaction mixture was concentrated, diluted with CHCl3, and washed with saturated Na2SO3 until the organic layer was clear. The organic phase was dried over MgSO4 and filtered. The volatile components of the filtrate were removed under reduced pressure to afford a crude solid which was washed with Et2O (3 x 5 mL) to afford **6*E*** as a pale yellow solid (328 mg, 76%): R*f* 0.36 (2:1 Hex:EtOAc); mp 193-196 C; IR (KBr) 3483, 1711, 1519, 1348, 1195, 1046, 970, 832, 762 cm-1; 1H NMR (300 MHz, CDCl3)  8.20 (d, *J* = 8.7 Hz, 2 H), 7.65-7.62 (m, 6 H), 7.59-7.44 (m, 6 H), 7.39-7.37 (m, 1 H), 7.29-7.27 (m, 2 H), 7.16 (s, 2 H), 6.47 (s, 1 H), 5.91 (s, 1 H), 5.65 (d, *J* = 6.2 Hz, 1 H), 5.18 (s, 2 H), 3.19 (d, *J* = 6.2 Hz, 1 H); 13C NMR (75 MHz, CDCl3)  165.9, 148.7, 141.2, 140.8, 137.9, 136.3, 134.5, 129.2, 129.0, 128.1, 127.9, 127.6, 127.2, 127.1, 126.9, 123.9, 73.0, 67.0; HRMS m/e calcd for C31H25NO5 491.1733, found 491.1718.

**(*E*)-2-[Hydroxy-(2-nitro-phenyl)-methyl]-acrylic acid 4-(2-biphenyl-4-yl-vinyl)-benzyl ester (7*E*).** A solution of acrylate **2*Z*** (190 mg, 0.56 mmol), DABCO (4 mg, 0.03 mmol), and 2-nitrobenzaldehyde (distilled under vacuum from CaH2, 140 mg, 0.95 mmol) in CH2Cl2 (50 L) was stirred at 23 C for 4 days. The solution was then diluted with CHCl3 (20 mL) and treated with water (20 mL). The organic phase was washed with brine (20 mL), dried over MgSO4, and filtered. The volatile components of the filtrate were removed under reduced pressure to afford a crude residue that was immediately dissolved in 1:1 Et2O:CCl4 (4 mL). Iodine (28 mg, 0.11 mmol) and benzoyl peroxide (7 mg, 0.03 mmol) were added and the solution was irradiated with a 250 W sunlamp for 5 h during which time reaction progress was monitored by 1H NMR according to the method detailed in the description of the preparation of ester **3*E***. The reaction mixture was concentrated, diluted with CHCl3, and washed with saturated Na2SO3 until the organic layer was clear. The organic phase was dried over MgSO4 and filtered. The volatile components of the filtrate were removed under reduced pressure to afford a crude solid which was washed with hexanes (1 x 10 mL) and Et2O (4 x 5 mL) to afford **7*E*** as a yellow solid (208 mg, 76%): R*f* 0.20 (2:1 Hex:EtOAc); mp 171-173 C; IR (neat) 3426, 1715, 1632, 1525, 1347, 1145, 970, 836, 764, 689 cm-1; 1H NMR (300 MHz, CDCl3)  7.97 (d, *J* = 7.9 Hz, 1 H), 7.74 (d, *J* = 7.7 Hz, 1 H), 7.66-7.59 (m, 7 H), 7.52-7.45 (m, 5 H), 7.40-7.34 (m, 1 H), 7.26 (d, *J* = 7.9 Hz, 2 H), 7.16 (s, 2 H), 6.47 (s, 1 H), 6.23 (s, 1 H), 5.82 (s, 1 H), 5.17 (ABq, *J* = 12.4 Hz, 2 H), 3.43 (br s , 1 H); 13C NMR (75 MHz, CDCl3)  165.9, 148.5, 140.8, 140.7, 137.7, 136.3, 134.8, 133.8, 129.1, 129.0, 128.9, 128.8, 128.2, 127.6, 127.2, 127.1, 126.9, 124.9, 67.9, 66.8; HRMS m/e calcd for C31H25NO5 491.1733, found 491.1732.

**(*E*)-2-(hydroxy-pyridin-3-yl-methyl)-acrylic acid (4-(2-biphenyl-4-yl-vinyl)-benzyl ester (8*E*). Method A.** A solution of acrylate **2*Z*** (225 mg, 0.66 mmol), DABCO (4 mg, 0.03 mmol), and nicotinaldehyde (distilled under vacuum from CaH2, 100 L, 1.13 mmol) in CH2Cl2 (65 L) was stirred at 23 C for 28 h. The volatile components of the reaction mixture were removed under reduced pressure to afford a crude residue that was immediately dissolved in CCl4 (3 mL). Iodine (34 mg, 0.13 mmol) and benzoyl peroxide (7 mg, 0.03 mmol) were added and the solution was irradiated with a 250 W sunlamp for 24 h during which time reaction progress was monitored by1H NMR according to the method detailed in the description of the preparation of ester **3*E***. The reaction mixture was concentrated, diluted with CHCl3, and washed with saturated Na2SO3 until the organic layer was clear. The organic phase was dried over MgSO4 and filtered. The volatile components of the filtrate were removed under reduced pressure to afford a crude solid which was washed with Et2O (5 x 5 mL) to afford **8*E*** as a white solid (239 mg, 81%): R*f* 0.03 (2:1 Hex:EtOAc); mp 229-232 C; IR (KBr) 3426, 1715, 1655, 1640, 1560, 1259, 1152, 1073, 962, 836, 760, 721 cm-1; 1H NMR (300 MHz, CDCl3)  8.63 (d, *J* = 1.8 Hz, 1 H), 8.56 (dd, *J* = 1.3, 4.7 Hz, 1 H), 7.73 (dt, *J* = 1.6, 8.0 Hz, 1 H), 7.65-7.59 (m, 6 H), 7.54-7.44 (m, 5 H), 7.39-7.34 (m, 1 H), 7.29 (d, *J* = 8.2 Hz, 2 H), 7.16 (s, 2 H), 6.47 (s, 1 H), 5.92 (s, 1 H), 5.64 (s, 1 H), 5.18 (s, 2 H), 3.16 (br s, 1 H); 13C NMR (75 MHz, DMSO-*d6*)  164.7, 143.1, 142.7, 141.7, 141.2, 139.5, 139.3, 136.9, 136.1, 135.0, 129.0, 128.4, 128.0, 127.5, 127.2, 126.9, 126.8, 126.6, 126.5, 125.9, 68.4, 65.8; HRMS m/e calcd for C30H25NO3 447.1834, found 447.1840.

**Method B.** A solution of acrylate **2*Z*** (178 mg, 0.52 mmol), DABCO (5 mg, 0.05 mmol), and nicotinaldehyde (distilled under vacuum from CaH2, 85 L, 0.89 mmol) in CH2Cl2 (520 L) was stirred at 23 C for 48 h. The volatile components of the reaction mixture were removed under reduced pressure to afford a crude residue that was immediately diluted with THF (1.7 mL). Diphenyldisulfide (113 mg, 0.52 mmol) was added and the solution was heated at reflux for 24 h during which time reaction progress was monitored by 1H NMR according to the method detailed in the description of the preparation of ester **3*E***. The volatile components of the mixture were removed under reduced pressure and the residue was washed with hexanes (3 x 15 mL), Et2O (2 x 10 mL), and MeOH (2 x 10 mL) to afford **8*E*** as a white solid (173 mg, 75%).

**2-(Hydroxy-phenyl-methyl)-acrylic acid (9).** A solution of ester **3*E*** (9.7 mg, 22 mol) and LiOHH2O (1.8 mg, 44 mol) in THF (200 L) and H2O (600 L) was heated at reflux for 1.25 h. The solution was cooled to 23 C and then filtered. The filtrate was carefully acidified to pH = 1 with 1 M HCl. This solution was extracted with EtOAc (3 x 10 mL), dried over MgSO4, and filtered. The volatile components of the filtrate were removed under reduced pressure to afford acid **9** as a white solid (2.8 mg, 72%): mp 73-74 C; IR (neat) 3687-2238, 1695, 1629, 1453, 1424, 1272, 1158, 1023, 965, 916, 842, 764, 700, 662 cm-1; 1H NMR (300 MHz, CDCl3)  7.38-7.28 (m, 5 H), 6.50 (s, 1 H), 5.98 (s, 1 H), 5.59 (s, 1 H); 13C NMR (75 MHz, CDCl3)  171.5, 141.4, 141.0, 128.8, 128.7, 128.2, 126.8, 73.0; HRMS m/e calcd for C10H9O3 (M-H)+ 177.0552, found 177.0552.

**2-(1-Hydroxy-3-phenyl-propyl)-acrylic acid (10).** A solution of ester **4*E*** (10.8 mg, 23 mol) and LiOHH2O (1.9 mg, 46 mol) in THF (200 L) and H2O (600 L) was heated at reflux for 1 h. The solution was cooled to 23 C then filtered. The filtrate was carefully acidified to pH = 1 with 1 M HCl. This solution was extracted with EtOAc (3 x 10 mL), dried over MgSO4, and filtered. The volatile components of the filtrate were removed under reduced pressure to afford acid **10** as a beige residue which solidified upon standing (2.8 mg, 72%): mp 75-76 C; IR (neat) 3616-2297, 1698, 1628, 1496, 1454, 1436, 1272, 1149, 1067, 1041, 961, 826, 749, 699 cm-1; 1H NMR (300 MHz, CDCl3)  7.33-7.18 (m, 5 H), 6.43 (s, 1 H), 5.95 (s, 1 H), 4.47 (app t, *J* = 6.4 Hz, 1 H), 2.89-2.67 (m, 2 H), 2.09-1.98 (m, 2 H); 13C NMR (75 MHz, CDCl3)  171.5, 141.5, 128.7, 128.6, 128.1, 126.1, 71.0, 37.6, 32.1; HRMS m/e calcd for C12H12O2 (M-H2O)+ 188.0837, found 188.0832.

**2-[(3-Chloro-phenyl)-hydroxy-methyl]-acrylic acid (11).** A solution of ester **5*E*** (90 mg, 0.188 mmol) and LiOHH2O (16 mg, 0.375 mmol) in THF (600 L) and H2O (1.8 mL) was heated at reflux for 4 h. The solution was cooled to 23 C then carefully acidified to pH = 1 with 6 M HCl. This solution was extracted with EtOAc (2 x 15 mL), washed with brine (2 x 15 mL), dried over MgSO4, and filtered. The volatile components of the filtrate were removed under reduced pressure to afford a crude residue that was extracted with EtOAc (2 mL). The EtOAc extract was filtered and the filtrate was concentrated, extracted again with EtOAc (1 mL), and filtered. The volatile components of the filtrate were removed under reduced pressure to afford acid **11** as a clear gum (34 mg, 85%): IR (neat) 3650-2400, 1697, 1630, 1596, 1576, 1477, 1431, 1281, 1193, 1101, 1081, 1033, 968, 911, 887, 787, 734, 698 cm-1; 1H NMR (300 MHz, CDCl3)  7.35 (s, 1 H), 7.28-7.21 (m, 3 H), 6.50 (s, 1 H), 5.96 (s, 1 H), 5.51 (s, 1 H); 13C NMR (75 MHz, CDCl3)  171.1, 143.0, 140.9, 134.6, 130.0, 129.4, 128.3, 127.0, 125.0, 72.3; HRMS m/e calcd for C10H9ClO3 212.0240, found 212.0240.

**2-[Hydroxy-(4-nitro-phenyl)-methyl]-acrylic acid (12).** A solution of ester **6*E*** (50 mg, 0.11 mmol) and LiOHH2O (9 mg, 0.22 mmol) in THF (500 L) and H2O (1.5 mL) was heated at reflux for 1 h. The solution was cooled to 23 C then filtered. The filtrate was carefully acidified to pH = 1 with 1 M HCl. This solution was extracted with EtOAc (3 x 15 mL), dried over MgSO4, and filtered. The volatile components of the filtrate were removed under reduced pressure to afford acid **12** as a light orange solid (20 mg, 83%): mp 120-121 C; IR (neat) 3513-2451, 1698, 1630, 1607, 1520, 1421, 1350, 1163, 1041, 859, 832, 701 cm-1; 1H NMR (300 MHz, CDCl3)  8.21 (d, *J* = 8.8 Hz, 2 H), 7.58 (d, *J* = 8.8 Hz, 2 H), 6.56 (s, 1 H), 6.03 (s, 1 H), 5.66 (s, 1 H); 13C NMR (75 MHz, acetone-*d6*)  167.0, 151.2, 147.8, 143.7, 128.6, 125.6, 123.8, 71.5; HRMS m/e calcd for C10H8NO5 (M-H)+ 222.0402, found 222.0407.

**2-[Hydroxy-(2-nitro-phenyl)-methyl]-acrylic acid (13).** A solution of ester **7*E*** (40 mg, 0.08 mmol) and LiOHH2O (7 mg, 0.16 mmol) in THF (500 L) and H2O (1.5 mL) was heated at reflux for 2 h. The solution was cooled to 23 C then carefully acidified to pH = 1 with 6 M HCl. This solution was extracted with EtOAc (2 x 10 mL), washed with brine (2 x 10 mL), dried over MgSO4, and filtered. The volatile components of the filtrate were removed under reduced pressure to afford a crude residue that was extracted with EtOAc (1 mL). The EtOAc extract was filtered and the volatile components of the filtrate were removed under reduced pressure to afford acid **13** as an orange solid (13 mg, 72%): mp 150-151 C; IR (neat) 3549-2590, 1698, 1629, 1525, 1442, 1345, 1290, 1157, 1029, 860, 790, 744, 705 cm-1; 1H NMR (300 MHz, CDCl3)  7.99 (dt, *J* = 1.2, 8.1 Hz, 1 H), 7.76 (dd, *J* = 1.4, 7.8 Hz, 1 H), 7.67 (dt, *J* = 1.1, 7.5 Hz, 1 H), 7.53-7.47 (dt, *J* = 1.6, 7.5 Hz, 1 H), 6.53 (s, 1 H), 6.21 (s, 1 H), 5.88 (s, 1 H); 13C NMR (75 MHz, acetone-*d6*)  166.9, 149.3, 143.6, 137.8, 133.6, 129.6, 129.1, 125.3, 124.7, 66.7; HRMS m/e calcd for C10H7NO4 (M-H2O)+ 205.0375, found 205.0374.
